# Supplementary material
Source: PubMed Central journal article supplement (PMC3028778)
Supplement: supp_55_2_921__1.pdf [file supp_55_2_921__1.pdf]

TABLE S1. Raw threshold cycle (Ct) values for efflux pump genes

| Strain  | NOR MIC ( $\mu\text{g/ml}$ ) | Ct            |               |               |               |               |               |                |
|---------|------------------------------|---------------|---------------|---------------|---------------|---------------|---------------|----------------|
|         |                              | <i>rpsL</i>   | <i>tolC</i>   | <i>acrA</i>   | <i>acrB</i>   | <i>mdfA</i>   | <i>norE</i>   |                |
| ELZ4009 | 0.047                        | 18.817        | 19.061        | 20.685        | 21.253        | 23.475        | 23.493        |                |
| ELZ4017 | 0.094                        | 17.974        | 18.344        | 20.077        | 21.301        | 22.746        | 23.305        |                |
| ELZ4018 | 0.068                        | 18.411        | 19.413        | 19.799        | 20.623        | 22.258        | 22.894        |                |
| ELZ4019 | 0.053                        | 19.375        | 19.047        | 20.743        | 21.550        | 24.019        | 24.362        |                |
| ELZ4020 | 0.040                        | 16.306        | 17.623        | 19.573        | 19.932        | 22.575        | 22.779        |                |
| ELZ4021 | 0.079                        | 17.705        | 17.929        | 19.923        | 19.967        | 21.845        | 23.534        |                |
| ELZ4022 | 0.063                        | 17.968        | 18.390        | 19.376        | 19.986        | 22.134        | 23.077        |                |
| ELZ4023 | 0.047                        | 17.058        | 17.798        | 20.120        | 20.210        | 23.212        | 23.991        |                |
| ELZ4032 | 0.064                        | 18.033        | 19.257        | 19.414        | 20.594        | 22.016        | 23.110        |                |
| ELZ4040 | 0.064                        | 18.001        | 18.169        | 19.957        | 19.828        | 23.111        | 23.776        |                |
| ELZ4041 | 0.115                        | 18.812        | 17.640        | 20.181        | 21.381        | 22.689        | 23.148        |                |
| ELZ4042 | 0.197                        | 16.810        | 17.956        | 19.982        | 19.795        | 22.456        | 23.008        |                |
| ELZ4043 | 0.056                        | 17.554        | 17.474        | 20.453        | 20.697        | 22.861        | 22.938        |                |
| ELZ4044 | 0.079                        | 17.467        | 17.981        | 19.922        | 20.165        | 24.220        | 23.192        |                |
| ELZ4045 | 0.042                        | 16.759        | 18.096        | 20.152        | 19.813        | 22.522        | 23.111        |                |
| ELZ4046 | 0.058                        | 18.263        | 19.204        | 20.417        | 21.332        | 22.607        | 22.800        |                |
| ELZ4047 | 0.079                        | 17.100        | 19.770        | 20.789        | 20.813        | 22.894        | 22.996        |                |
| ELZ4048 | 0.338                        | 17.359        | 18.223        | 20.423        | 20.664        | 22.588        | 24.562        |                |
| ELZ4056 | 0.064                        | 17.938        | 17.183        | 20.444        | 20.972        | 22.411        | 23.121        |                |
| ELZ4098 | 0.056                        | 16.515        | 19.620        | 19.608        | 19.592        | 22.931        | 23.059        |                |
| ELZ4104 | 0.047                        | 16.429        | 19.402        | 19.659        | 20.250        | 21.614        | 22.848        |                |
| ELZ4234 | 0.079                        | 17.549        | 18.184        | 20.182        | 19.948        | 23.298        | 24.474        |                |
| ELZ4244 | 0.032                        | 16.720        | 20.064        | 19.984        | 19.037        | 23.186        | 22.643        |                |
| ELZ4264 | 0.023                        | 15.293        | 20.174        | 20.954        | 20.317        | 21.005        | 23.662        |                |
|         |                              | <b>17.509</b> | <b>18.583</b> | <b>20.117</b> | <b>20.418</b> | <b>22.695</b> | <b>23.329</b> | <b>Average</b> |

Ct values were measured thrice; shown are the raw values for one replicate.
